# Supplementary figures and images for: Treatment of obstructive sleep apnea with oral appliances
Source: Springer Nature journal article supplement (doi:10.1186/2196-1042-14-10), 2013-05-23

# Apnea hypopnea Index-sequence TB- Wrap

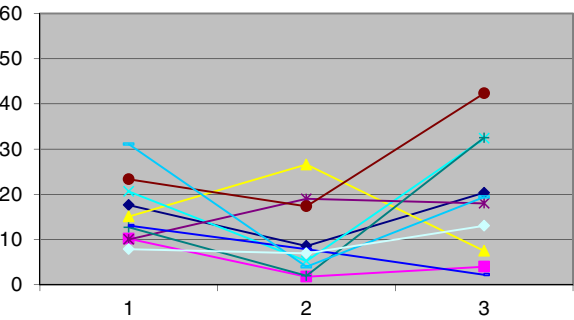

Supplement: 40510_2013_35_MOESM3_ESM.pdf [file 40510_2013_35_MOESM3_ESM.pdf]

# Apnea hypopnea Index-sequence Wrap-TB

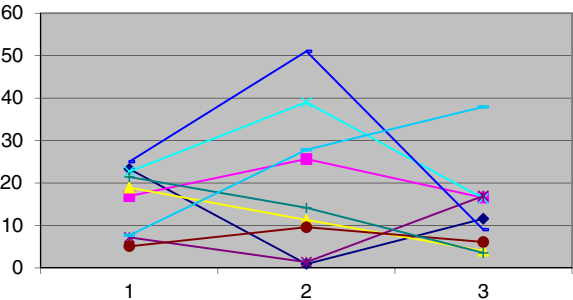

Supplement: 40510_2013_35_MOESM4_ESM.pdf [file 40510_2013_35_MOESM4_ESM.pdf]

# Apnea Index-sequence TB-Wrap

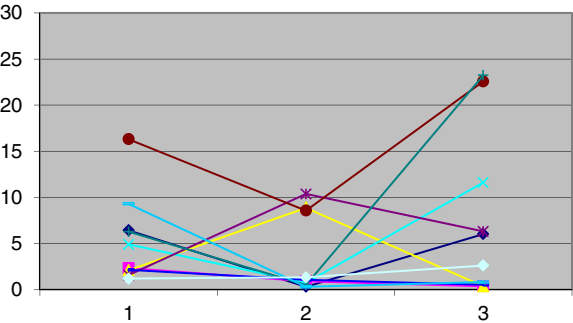

Supplement: 40510_2013_35_MOESM5_ESM.pdf [file 40510_2013_35_MOESM5_ESM.pdf]

# Apnea Index-sequence Wrap-TB

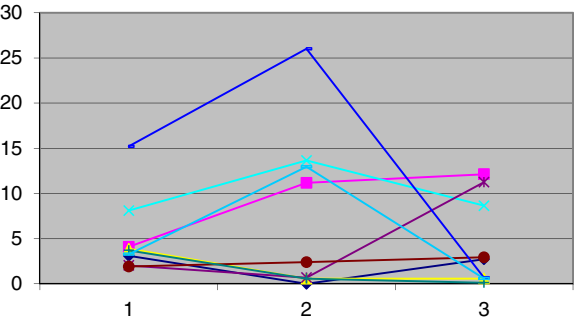

Supplement: 40510_2013_35_MOESM6_ESM.pdf [file 40510_2013_35_MOESM6_ESM.pdf]

# Oxyhemoglobin Saturation

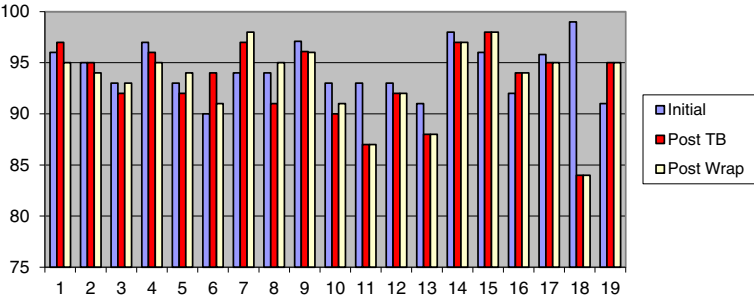

Supplement: 40510_2013_35_MOESM7_ESM.pdf [file 40510_2013_35_MOESM7_ESM.pdf]

# Sleep Efficiency

120

100

80

60

40

20

0

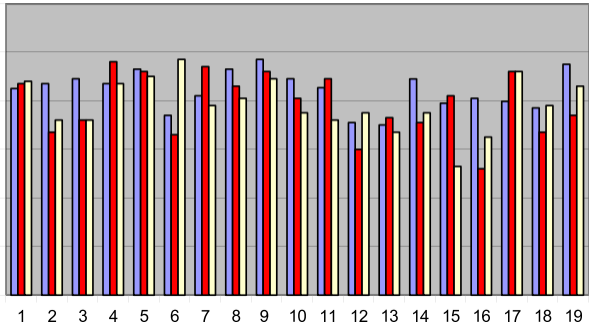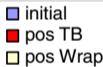

Supplement: 40510_2013_35_MOESM8_ESM.pdf [file 40510_2013_35_MOESM8_ESM.pdf]

# % REM Sleep

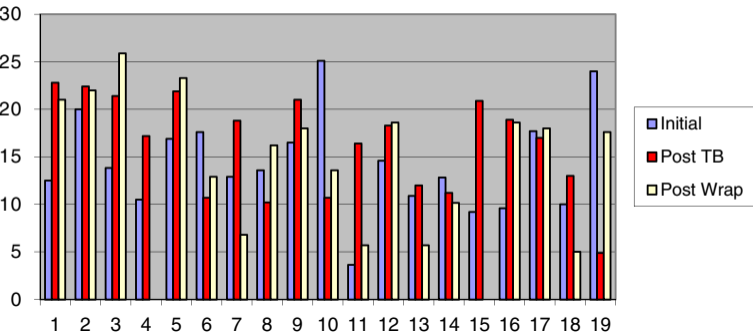

Supplement: 40510_2013_35_MOESM9_ESM.pdf [file 40510_2013_35_MOESM9_ESM.pdf]
